# Supplementary material for: Copy number variant detection with low-coverage whole-genome sequencing is a viable alternative to the traditional array-CGH
Source: medRxiv preprint, doi:10.1101/2020.09.07.20183665, version 2 (2021-03-21)
Supplement: Supplemental Table 2. [file 183665_file07.xlsx]

## Sheet: gs2_full
ID	Sex	Material	UMR	Chromosome	Start	End	Length	Type	ACGH_start	ACGH_end	ACGH_length	Probes	Genes	Note	Overlap	Outer_overlap
12672	XX	PK	26932422	chr8	180000	146260000	146080000	DUP	191530	146280020	146088490	1670	1897	mozaic	146068470	0.999784
12469	XX	PK	27188148	chr14	20460000	107240000	86780000	DUP	20439005	107258824	86819819	1391	1912	mozaic	86780000	0.999541
18937	XX	AF	7275133	chr2	209040000	242840000	33800000	DUP	209113856	242815972	33702116	521	752		33702116	0.997104
56446	XY	PK	10066011	chr4	6060000	36060000	30000000	DUP	6066702	35935983	29869281	234	245		29869281	0.995643
12464	XX	PK	26450434	chr3	171080000	197760000	26680000	DUP	171214816	197803820	26589004	390	483		26545184	0.993315
56441	XX	PK	11389554	chr18	58760000	77980000	19220000	DEL	59016331	77982126	18965795	225	169		18963669	0.986554
12677	XY	PK	38563795	chr11	116680000	134920000	18240000	DUP	116723438	134446160	17722722	339	522		17722722	0.97164
18937	XX	AF	7275133	chr18	61080000	77980000	16900000	DEL	61147827	77982126	16834299	195	144		16832173	0.995861
12465	XY	PK	26683857	chr20	60000	16380000	16320000	DUP	70580	16360098	16289518	259	338		16289518	0.998132
17758	XY	PK	5305413	chr13	37520000	53040000	15520000	DEL	37582916	53045644	15462728	235	264		15457084	0.995584
12674	XY	PK	29459406	chr8	36120000	50060000	13940000	DUP	34374091	43056153	8682062	157	204	mozaic	6936153	0.44219
12462	XY	PK	26281173	chr9	200000	13580000	13380000	DEL	322456	13374304	13051848	140	143		13051848	0.975474
21991	XY	PK	9798038	chr20	49640000	62900000	13260000	DUP	49633831	62893189	13259358	254	336		13253189	0.999022
12473	XY	PK	26596032	chr9	71040000	81360000	10320000	DEL	71035346	81311028	10275682	138	129		10271028	0.994806
12675	XY	PK	19162737	chr3	184480000	194520000	10040000	DEL	184935913	194520636	9584723	137	156		9584087	0.95453
12468	XY	PK	26997988	chr10	123140000	132520000	9380000	DEL	123241651	132082817	8841166	134	175		8841166	0.942555
12820	XX	PK	10864541	chr8	40660000	49800000	9140000	DUP	40683161	49646409	8963248	75	97		8963248	0.980662
12466	XY	PK	29179577	chrY	15660000	24500000	8840000	DEL	15815875	24874360	9058485	67	52		8684125	0.942456
21991	XY	PK	9798038	chrY	16160000	24500000	8340000	DEL	16178320	24874360	8696040	62	50		8321680	0.954939
12465	XY	PK	26683857	chr2	235160000	242840000	7680000	DEL	235313245	243041364	7728119	117	196		7526755	0.955007
56446	XY	PK	10066011	chr4	80000	6040000	5960000	DEL	72447	5948849	5876402	122	239		5868849	0.98346
12463	XY	PK	25187715	chrX	121420000	126740000	5320000	DUP	121582859	126733967	5151108	44	27		5151108	0.968253
12676	XY	PK	29570484	chr10	130380000	135400000	5020000	DUP	130977858	135234843	4256985	69	81		4256985	0.848005
12472	XY	PK	31775093	chr8	8100000	11840000	3740000	DEL	7303187	11732948	4429761	60	64		3632948	0.800771
12471	XX	PK	28371981	chrX	146760000	150480000	3720000	DEL	146824301	150408283	3583982	54	74		3583982	0.963436
12823	XX	PK	11077279	chr17	16800000	20200000	3400000	DEL	16822683	20193169	3370486	101	179		3370486	0.991319
12677	XY	PK	38563795	chr22	17260000	20240000	2980000	DUP	17096855	20311763	3214908	72	156		2980000	0.926932
12671	XY	PK	31129731	chr14	87620000	90200000	2580000	DEL	87860006	90190603	2330597	36	41		2330597	0.903332
12670	XX	PK	28769319	chr22	18980000	21440000	2460000	DEL	18896972	21379958	2482986	72	138		2399958	0.94374
17863	XY	PK	4049958	chr7	72800000	75180000	2380000	DUP	72700414	74139390	1438976	45	111		1339390	0.540167
12819	XY	PK	10020005	chr1	145380000	147720000	2340000	DUP	144927778	147242847	2315069	41	99		1862847	0.667156
12818	XY	PK	11398414	chr9	26260000	28320000	2060000	DEL	26321885	28213424	1891539	29	27		1891539	0.918223
12673	XX	PK	30705575	chrX	6460000	8100000	1640000	DUP	6457403	8032120	1574717	15	10		1572120	0.957094
12824	XX	PK	11638997	chrX	6460000	8100000	1640000	DEL	6551155	8032120	1480965	15	10		1480965	0.903027
12464	XX	PK	26450434	chr17	0	1520000	1520000	DEL	48539	1537789	1489250	53	64		1471461	0.956868
12827	XX	PK	9588354	chr16	82180000	83660000	1480000	DUP				9	7
56441	XX	PK	11389554	chr2	241360000	242840000	1480000	DUP	241394627	243041364	1646737	35	105		1445373	0.859643
12470	XY	PK	27437116	chr4	171660000	173080000	1420000	DEL	171794591	173074943	1280352	6	1		1280352	0.901656
12822	XX	PK	11254672	chr14	54540000	55940000	1400000	DEL	54688294	55890953	1202659	37	34		1202659	0.859042
12467	XY	PK	29211205	chr7	72740000	74120000	1380000	DEL	72700414	74139390	1438976	42	76		1380000	0.959015
12816	XX	PK	11351403	chr7	72740000	74120000	1380000	DUP	72726578	74139390	1412812	42	76		1380000	0.976775
17175	XY	AF	7555460	chr17	34820000	36200000	1380000	DUP	34817422	36168104	1350682	36	56		1348104	0.975065
12671	XY	PK	31129731	chr15	31160000	32420000	1260000	DUP	31123186	32914140	1790954	25	28		1260000	0.703536
18478	XY	AF	10124042	chr15	31160000	32420000	1260000	DUP	31203395	32510863	1307468	25	28		1216605	0.900613
12821	XX	PK	11181542	chr15	31180000	32420000	1240000	DUP	31123186	32914140	1790954	25	28		1240000	0.692368
12815	XY	PK	13212728	chr11	62480000	63480000	1000000	DUP	62475483	63490516	1015033	31	68		1000000	0.98519
56436	XX	PK	4424468	chr18	27240000	28120000	880000	DUP	27299781	28080330	780549	6	0		780549	0.886988
18163	XY	AF	7065038	chr5	4260000	5060000	800000	DUP				3	0
12827	XX	PK	9588354	chr1	181500000	182280000	780000	DUP				10	7
16511	XY	PK	7480472	chr3	560000	1320000	760000	DUP				7	3
12466	XY	PK	29179577	chr1	248560000	249200000	640000	DEL	249104603	249212668	108065	6	24		95397	0.146165
12827	XX	PK	9588354	chr2	127180000	127700000	520000	DEL				3	3
56444	XY	PK	9581821	chr10	92080000	92600000	520000	DUP				5	3
56605	XX	AF	5478208	chr10	92080000	92580000	500000	DUP				4	3
12827	XX	PK	9588354	chrX	31600000	32040000	440000	DEL				3	1
16322	XY	PK	17811367	chr18	29240000	29680000	440000	DUP	29254594	29675584	420990	8	12		420990	0.956795
12828	XY	PK	10292567	chr12	84020000	84440000	420000	DUP				1	0
18021	XY	PK	2528837	chr3	108480000	108900000	420000	DUP	108474491	109237152	762661	6	6		420000	0.550703
16322	XY	PK	17811367	chr9	11520000	11920000	400000	DEL				3	0
57343	XY	AF	5245824	chrX	140340000	140740000	400000	DUP				3	3
12470	XY	PK	27437116	chr4	151660000	152040000	380000	DUP				4	8
19149	XY	AF	8387785	chr20	29820000	30200000	380000	DUP	29888477	30193658	305181	9	17		305181	0.803108
57343	XY	AF	5245824	chr16	82960000	83340000	380000	DEL				1	2
18479	XX	AF	5363142	chr12	21020000	21380000	360000	DEL	21011274	21377322	366048	8	6		357322	0.969072
12671	XY	PK	31129731	chr14	90780000	91120000	340000	DEL				3	7
13059	XY	PK	16695304	chr11	134360000	134700000	340000	DUP				1	0
16322	XY	PK	17811367	chr1	145380000	145720000	340000	DEL	145413388	145747269	333881	19	37		306612	0.834843
12824	XX	PK	11638997	chr10	2240000	2560000	320000	DEL				1	0
12837	XY	PK	8785985	chr1	175420000	175740000	320000	DUP				4	2
17175	XY	AF	7555460	chr2	180120000	180440000	320000	DUP				2	5
18020	XX	PK	3490484	chr14	76100000	76420000	320000	DUP	76124060	76438023	313963	7	9		295940	0.875503
12817	XX	PK	12219402	chr16	31640000	31940000	300000	DUP				9	7
12844	XX	PK	8860718	chr7	110940000	111240000	300000	DEL				3	3
18293	XX	PK	8281536	chr10	66380000	66680000	300000	DEL				0	0
56444	XY	PK	9581821	chrX	65720000	66020000	300000	DEL	65815490	65895015	79525	4	6		79525	0.265083
56605	XX	AF	5478208	chrX	65720000	66020000	300000	DEL	65815490	65895015	79525	4	6		79525	0.265083
57348	XY	AF	4907949	chr7	112140000	112440000	300000	DUP				3	3
12467	XY	PK	29211205	chr5	25080000	25360000	280000	DUP				1	0
57347	XX	AF	2856850	chr12	34360000	34640000	280000	DUP				1	0
12463	XY	PK	25187715	chr6	168320000	168580000	260000	DUP				7	15
12672	XX	PK	26932422	chr5	77840000	78100000	260000	DUP				2	2
12817	XX	PK	12219402	chr15	22800000	23060000	260000	DUP	20849110	23699760	2850650	8	16		260000	0.0912073
12835	XX	PK	8320889	chr3	163660000	163920000	260000	DEL				1	0
13064	XY	PK	13721831	chr6	163000000	163260000	260000	DEL				2	13
57610	XX	AF	4886143	chr7	100840000	101100000	260000	DUP				11	15
12840	XY	PK	8469681	chrX	3980000	4220000	240000	DUP				2	0
18021	XY	PK	2528837	chr7	62140000	62380000	240000	DUP				0	0
56441	XX	PK	11389554	chr14	44940000	45180000	240000	DEL				2	1
12825	XY	PK	11861713	chr15	76360000	76580000	220000	DUP				5	6
12837	XY	PK	8785985	chr20	14660000	14880000	220000	DEL				1	0
21991	XY	PK	9798038	chr1	208780000	208980000	200000	DUP				1	0
56605	XX	AF	5478208	chr16	8780000	8980000	200000	DUP	8798181	8943190	145009	8	19		145009	0.725045
57348	XY	AF	4907949	chr7	62140000	62340000	200000	DUP				0	0
59805	XY	AF	2643801	chr14	24380000	24580000	200000	DUP				8	32
12469	XX	PK	27188148	chr6	68240000	68420000	180000	DEL				1	0
12844	XX	PK	8860718	chr17	41440000	41620000	180000	DUP				10	13
19149	XY	AF	8387785	chr1	102660000	102840000	180000	DEL				1	0
56444	XY	PK	9581821	chr16	8800000	8980000	180000	DUP				7	19
57348	XY	AF	4907949	chr22	25740000	25920000	180000	DUP				3	3
12464	XX	PK	26450434	chr21	16960000	17120000	160000	DUP				2	4
12467	XY	PK	29211205	chr7	110880000	111040000	160000	DEL				0	0
12671	XY	PK	31129731	chr8	137680000	137840000	160000	DEL				0	0
12675	XY	PK	19162737	chr8	137680000	137840000	160000	DEL				0	0
12821	XX	PK	11181542	chr8	137680000	137840000	160000	DEL				0	0
12823	XX	PK	11077279	chr10	9540000	9700000	160000	DEL				0	0
18762	XY	PK	6719138	chr13	43540000	43700000	160000	DUP				5	3
57814	XY	PK	5211590	chr3	118700000	118860000	160000	DUP				4	3
12463	XY	PK	25187715	chr2	124820000	124960000	140000	DEL				1	0
12464	XX	PK	26450434	chr21	32080000	32220000	140000	DUP				6	5
12815	XY	PK	13212728	chr14	42220000	42360000	140000	DEL				2	0
12829	XY	PK	9803743	chr20	19660000	19800000	140000	DUP				2	1
12838	XY	PK	8964993	chr21	16980000	17120000	140000	DUP				2	4
12838	XY	PK	8964993	chr21	32080000	32220000	140000	DUP				6	5
16322	XY	PK	17811367	chr5	83320000	83460000	140000	DUP				2	1
18163	XY	AF	7065038	chr6	5240000	5380000	140000	DEL				2	5
18763	XY	PK	4919913	chr8	125060000	125200000	140000	DEL				2	1
56441	XX	PK	11389554	chr10	45200000	45340000	140000	DUP				0	0
57021	XX	AF	4870485	chr2	241720000	241860000	140000	DUP				4	9
59804	XY	AF	6675337	chr8	58400000	58540000	140000	DUP				1	0
12469	XX	PK	27188148	chr22	45700000	45820000	120000	DUP				5	7
12470	XY	PK	27437116	chr20	32080000	32200000	120000	DUP				4	3
12473	XY	PK	26596032	chr13	31720000	31840000	120000	DUP				4	6
12670	XX	PK	28769319	chr9	37340000	37460000	120000	DUP				3	12
12671	XY	PK	31129731	chr13	31720000	31840000	120000	DUP				4	6
12677	XY	PK	38563795	chr7	111060000	111180000	120000	DEL				1	0
12818	XY	PK	11398414	chr12	112180000	112300000	120000	DUP				7	7
12822	XX	PK	11254672	chr7	101000000	101120000	120000	DUP				2	1
16510	XY	AF	4714807	chrX	115920000	116040000	120000	DUP				0	0
17171	XY	AF	6710069	chr16	21600000	21720000	120000	DEL	21599687	21837551	237864	5	8		120000	0.50449
18937	XX	AF	7275133	chr7	133740000	133860000	120000	DEL				3	6
18937	XX	AF	7275133	chr10	35020000	35140000	120000	DUP				3	12
57021	XX	AF	4870485	chr16	21600000	21720000	120000	DUP				5	8
57499	XX	PK	824523	chr1	43720000	43840000	120000	DUP				8	25
12466	XY	PK	29179577	chr14	44820000	44920000	100000	DUP				0	0
12471	XX	PK	28371981	chr10	55280000	55380000	100000	DEL				0	0
12473	XY	PK	26596032	chr7	16280000	16380000	100000	DEL				0	0
12672	XX	PK	26932422	chr12	8000000	8100000	100000	DUP				6	8
12824	XX	PK	11638997	chr12	8000000	8100000	100000	DUP				6	8
12827	XX	PK	9588354	chr5	18880000	18980000	100000	DUP				1	0
12829	XY	PK	9803743	chr10	45220000	45320000	100000	DUP				0	0
12831	XY	PK	8746483	chr15	93960000	94060000	100000	DEL				2	0
13059	XY	PK	16695304	chr1	145620000	145720000	100000	DUP				4	3
13065	XY	PK	13671758	chr13	85160000	85260000	100000	DUP				0	0
18021	XY	PK	2528837	chr11	134640000	134740000	100000	DUP				0	0
18021	XY	PK	2528837	chr19	28160000	28260000	100000	DUP				0	0
18479	XX	AF	5363142	chr13	95920000	96020000	100000	DUP				1	7
18762	XY	PK	6719138	chr17	59840000	59940000	100000	DUP				2	1
18938	XX	AF	5938047	chr7	4340000	4440000	100000	DUP				0	0
19149	XY	AF	8387785	chrX	151640000	151740000	100000	DEL				0	0
56603	XY	AF	6133080	chr11	34260000	34360000	100000	DUP				3	0
57021	XX	AF	4870485	chr2	82200000	82300000	100000	DUP				0	0
59804	XY	AF	6675337	chr1	231700000	231800000	100000	DUP				1	28
59805	XY	AF	2643801	chr16	85640000	85740000	100000	DUP				5	7
12462	XY	PK	26281173	chr10	21620000	21700000	80000	DUP				0	0
12463	XY	PK	25187715	chr9	4320000	4400000	80000	DEL				0	0
12465	XY	PK	26683857	chr18	39620000	39700000	80000	DUP				1	3
12670	XX	PK	28769319	chr7	4840000	4920000	80000	DUP				2	4
12671	XY	PK	31129731	chr17	64400000	64480000	80000	DEL				0	0
12672	XX	PK	26932422	chr1	90980000	91060000	80000	DUP				1	0
12815	XY	PK	13212728	chr14	106940000	107020000	80000	DEL				1	0
12818	XY	PK	11398414	chr12	31980000	32060000	80000	DUP				1	0
12822	XX	PK	11254672	chrX	6720000	6800000	80000	DEL				0	0
12823	XX	PK	11077279	chr3	63780000	63860000	80000	DUP				3	5
12825	XY	PK	11861713	chr1	9300000	9380000	80000	DUP				3	2
12831	XY	PK	8746483	chr1	219600000	219680000	80000	DEL				1	0
12831	XY	PK	8746483	chr19	4320000	4400000	80000	DUP				6	11
12834	XX	PK	8719070	chr1	189340000	189420000	80000	DEL				0	0
12837	XY	PK	8785985	chr11	24000000	24080000	80000	DEL				0	0
12844	XX	PK	8860718	chr3	94000000	94080000	80000	DUP				0	0
13059	XY	PK	16695304	chr2	13200000	13280000	80000	DUP				0	0
13061	XY	PK	13117632	chr12	3760000	3840000	80000	DEL				1	0
13065	XY	PK	13671758	chr11	37740000	37820000	80000	DUP				0	0
13066	XY	PK	14563509	chr3	65780000	65860000	80000	DUP				0	0
13066	XY	PK	14563509	chr20	14800000	14880000	80000	DEL				1	0
16511	XY	PK	7480472	chr19	33320000	33400000	80000	DEL	33321553	33360475	38922	4	5		38922	0.486525
17175	XY	AF	7555460	chr3	5980000	6060000	80000	DUP				1	0
17865	XY	PK	4415350	chr6	140760000	140840000	80000	DEL				0	0
18163	XY	AF	7065038	chr1	9320000	9400000	80000	DUP				2	2
18163	XY	AF	7065038	chrX	112980000	113060000	80000	DUP				1	0
18294	XX	PK	8430733	chrX	151640000	151720000	80000	DEL				0	0
18761	XX	PK	5939328	chr8	13540000	13620000	80000	DEL				1	0
18762	XY	PK	6719138	chr2	13200000	13280000	80000	DUP				0	0
18763	XY	PK	4919913	chr1	77540000	77620000	80000	DEL				3	4
18763	XY	PK	4919913	chr6	140780000	140860000	80000	DEL				0	0
19149	XY	AF	8387785	chr6	820000	900000	80000	DUP				0	0
19149	XY	AF	8387785	chr15	53520000	53600000	80000	DUP				0	0
56604	XY	AF	4545734	chr18	64180000	64260000	80000	DUP				2	1
56605	XX	AF	5478208	chr15	53500000	53580000	80000	DUP				1	0
57021	XX	AF	4870485	chr4	130320000	130400000	80000	DUP				0	0
57609	XX	PK	9112018	chr14	63780000	63860000	80000	DUP				2	6
57610	XX	AF	4886143	chr7	157720000	157800000	80000	DUP				0	0
57814	XY	PK	5211590	chr5	104200000	104280000	80000	DEL				0	0
59805	XY	AF	2643801	chr17	18040000	18120000	80000	DEL				4	10
